# Supplementary material
Source: Springer Nature journal article supplement (https://www.springermedizin.de/resource/supplementary/12967_2010_660_MOESM12_ESM.pdf/9577230)

■ SCLC Transgenic Mouse 2 FOLD ■ SCLC Human 2 FOLD

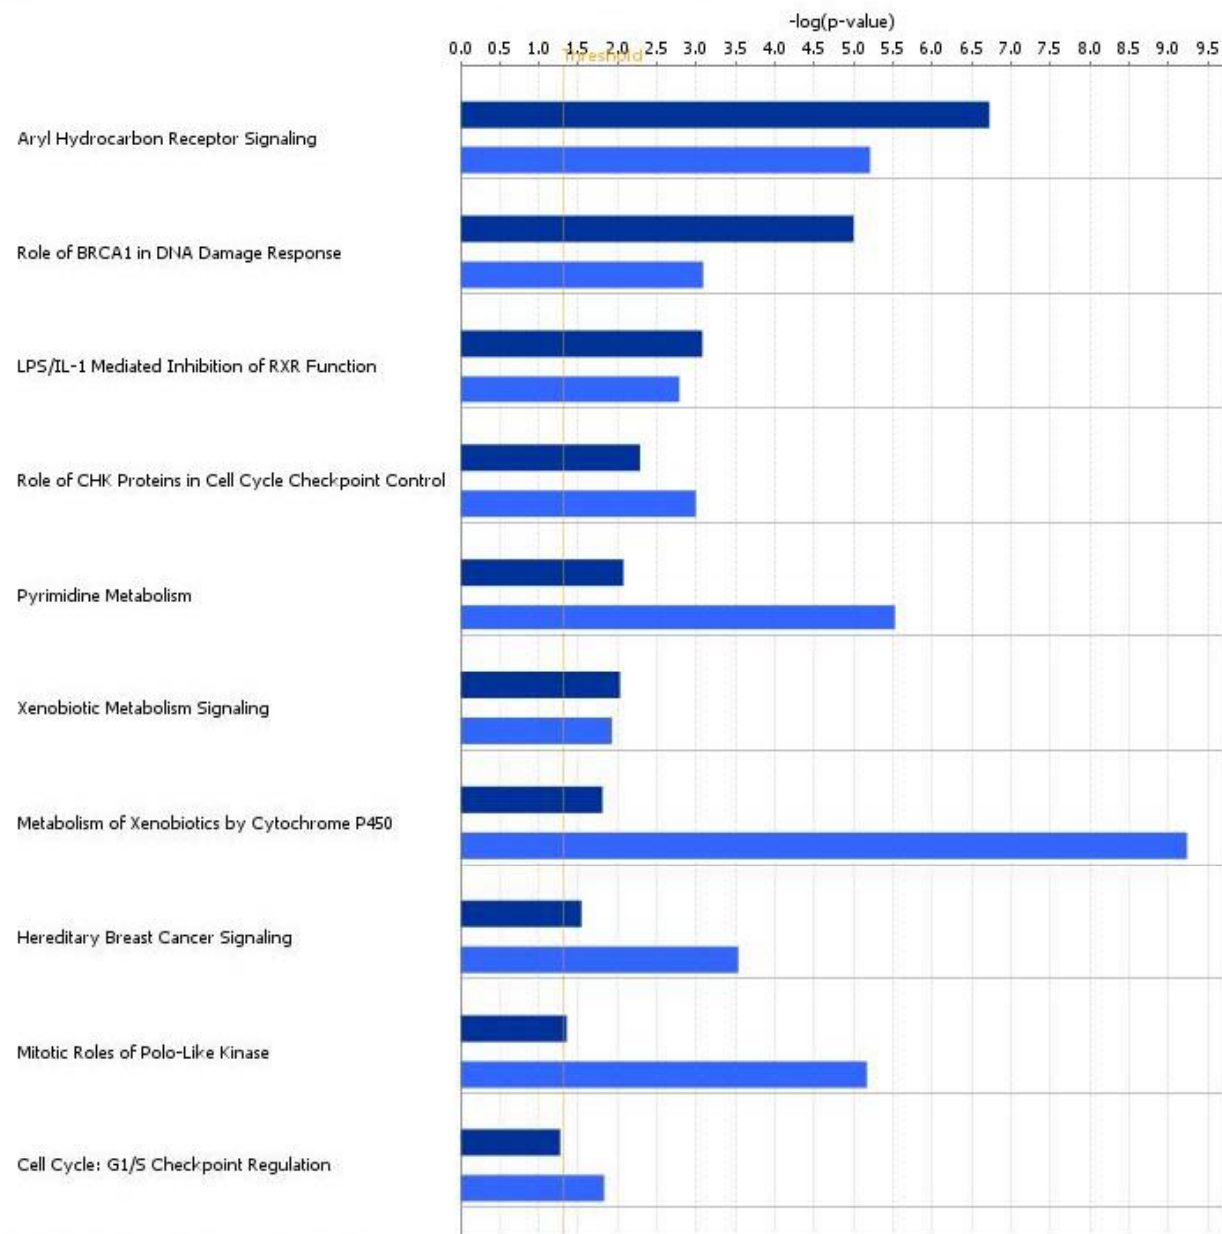

Supplement: MOESM12 [file 9577230]
